# Supplementary material for: An optical dynamic study of MAPbBr3 single crystals passivated with MAPbCl3/I3-MAPbBr3 heterojunctions
Source: Royal Society of Chemistry journal article supplement (doi:10.1039/c6cp07182a), 2017-01-01

## Supplementary Information

Haizhou Lu<sup>1</sup>, Huotian Zhang<sup>1</sup>, Sijian Yuan<sup>1</sup>, Jiao Wang<sup>1</sup>, Yiqiang Zhan<sup>1\*</sup>, Lirong Zheng<sup>1,2\*</sup>

1. State Key Laboratory of ASIC and System, SIST, Fudan University, Shanghai 200433,  
China

2. Royal Inst Technol KTH, iPack VINN Excellence Ctr, S-16440 Stockholm, Sweden

\*e-mail: yqzhan@fudan.edu.cn, lrzheng@fudan.edu.cn

S1. Decay curve of MAPbBr<sub>3</sub> single crystals with MAPbBr<sub>3</sub>-MAPbI<sub>3</sub> heterojunctions.

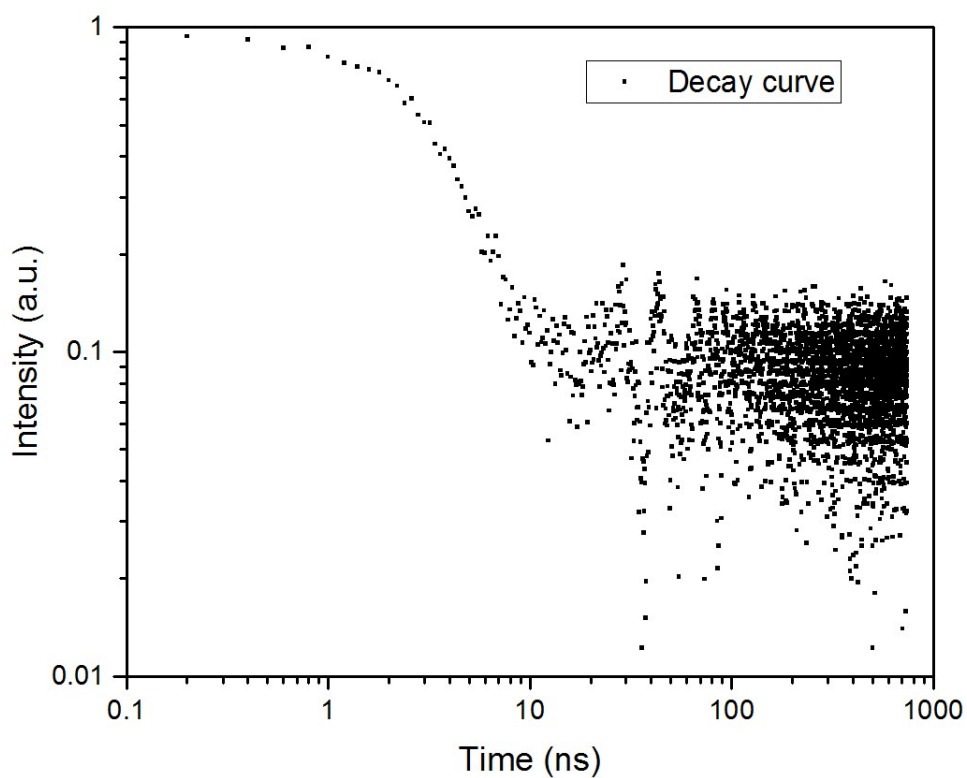

S2. Lifetime fitting of MAPbBr<sub>3</sub> single crystals under 355 nm excitations with various excitation intensities.

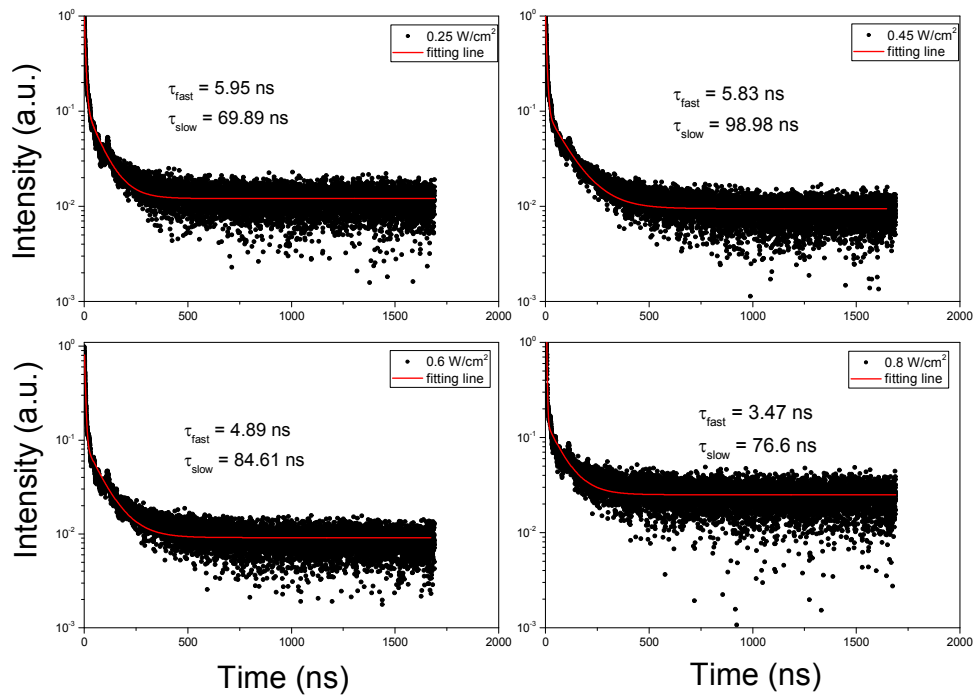

S3. Lifetime fitting of MAPbBr<sub>3</sub> single crystals with MAPbCl<sub>3</sub>-MAPbI<sub>3</sub> heterojunctions under 532 nm excitations with various excitation intensities.

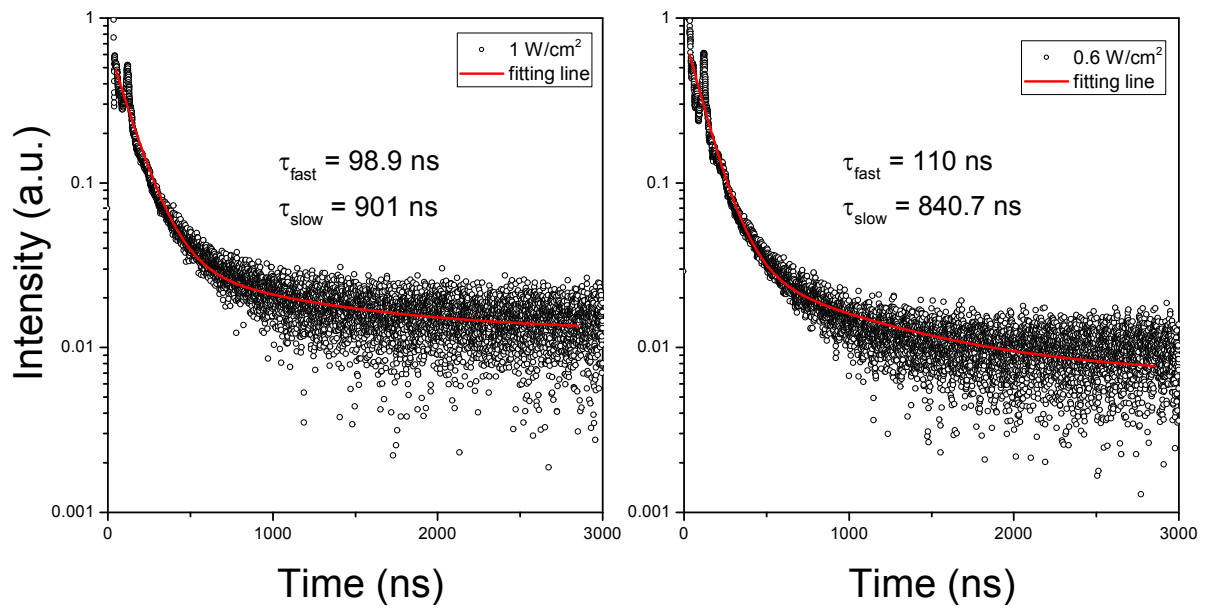

Supplement: c6cp07182a1.pdf [file c6cp07182a1.pdf]
